# Supplementary material for: The Potential Use of Radiomics with Pre-Radiation Therapy MR Imaging in Predicting Risk of Pseudoprogression in Glioblastoma Patients
Source: PubMed Central journal article supplement (PMC8321255; doi:10.3390/jimaging7020017), 2021-01-28
Supplement: jimaging-07-00017-s001.pdf [file jimaging-07-00017-s001.pdf]

Supplementary Table 1: Radiomics features analyzed in the study.

| Image type | Feature class | Feature name                         |
|------------|---------------|--------------------------------------|
| original   | shape         | Maximum3DDiameter                    |
| original   | shape         | Maximum2DDiameterSlice               |
| original   | shape         | Sphericity                           |
| original   | shape         | MinorAxis                            |
| original   | shape         | Elongation                           |
| original   | shape         | SurfaceVolumeRatio                   |
| original   | shape         | Volume                               |
| original   | shape         | MajorAxis                            |
| original   | shape         | SurfaceArea                          |
| original   | shape         | Flatness                             |
| original   | shape         | LeastAxis                            |
| original   | shape         | Maximum2DDiameterColumn              |
| original   | shape         | Maximum2DDiameterRow                 |
| original   | gldm          | GrayLevelVariance                    |
| original   | gldm          | HighGrayLevelEmphasis                |
| original   | gldm          | DependenceEntropy                    |
| original   | gldm          | DependenceNonUniformity              |
| original   | gldm          | GrayLevelNonUniformity               |
| original   | gldm          | SmallDependenceEmphasis              |
| original   | gldm          | SmallDependenceHighGrayLevelEmphasis |
| original   | gldm          | DependenceNonUniformityNormalized    |
| original   | gldm          | LargeDependenceEmphasis              |
| original   | gldm          | LargeDependenceLowGrayLevelEmphasis  |
| original   | gldm          | DependenceVariance                   |
| original   | gldm          | LargeDependenceHighGrayLevelEmphasis |
| original   | gldm          | SmallDependenceLowGrayLevelEmphasis  |
| original   | gldm          | LowGrayLevelEmphasis                 |
| original   | glcm          | JointAverage                         |
| original   | glcm          | SumAverage                           |
| original   | glcm          | JointEntropy                         |
| original   | glcm          | ClusterShade                         |
| original   | glcm          | MaximumProbability                   |
| original   | glcm          | Idmn                                 |
| original   | glcm          | JointEnergy                          |
| original   | glcm          | Contrast                             |
| original   | glcm          | DifferenceEntropy                    |
| original   | glcm          | InverseVariance                      |
| original   | glcm          | DifferenceVariance                   |
| original   | glcm          | Idn                                  |
| original   | glcm          | Idm                                  |
| original   | glcm          | Correlation                          |
| original   | glcm          | Autocorrelation                      |
| original   | glcm          | SumEntropy                           |
| original   | glcm          | SumSquares                           |
| original   | glcm          | ClusterProminence                    |
| original   | glcm          | Imc2                                 |

|          |            |                                  |
|----------|------------|----------------------------------|
| original | glcm       | Imc1                             |
| original | glcm       | DifferenceAverage                |
| original | glcm       | Id                               |
| original | glcm       | ClusterTendency                  |
| original | firstorder | InterquartileRange               |
| original | firstorder | Skewness                         |
| original | firstorder | Uniformity                       |
| original | firstorder | Median                           |
| original | firstorder | Energy                           |
| original | firstorder | RobustMeanAbsoluteDeviation      |
| original | firstorder | MeanAbsoluteDeviation            |
| original | firstorder | TotalEnergy                      |
| original | firstorder | Maximum                          |
| original | firstorder | RootMeanSquared                  |
| original | firstorder | 90Percentile                     |
| original | firstorder | Minimum                          |
| original | firstorder | Entropy                          |
| original | firstorder | Range                            |
| original | firstorder | Variance                         |
| original | firstorder | 10Percentile                     |
| original | firstorder | Kurtosis                         |
| original | firstorder | Mean                             |
| original | glrlm      | ShortRunLowGrayLevelEmphasis     |
| original | glrlm      | GrayLevelVariance                |
| original | glrlm      | LowGrayLevelRunEmphasis          |
| original | glrlm      | GrayLevelNonUniformityNormalized |
| original | glrlm      | RunVariance                      |
| original | glrlm      | GrayLevelNonUniformity           |
| original | glrlm      | LongRunEmphasis                  |
| original | glrlm      | ShortRunHighGrayLevelEmphasis    |
| original | glrlm      | RunLengthNonUniformity           |
| original | glrlm      | ShortRunEmphasis                 |
| original | glrlm      | LongRunHighGrayLevelEmphasis     |
| original | glrlm      | RunPercentage                    |
| original | glrlm      | LongRunLowGrayLevelEmphasis      |
| original | glrlm      | RunEntropy                       |
| original | glrlm      | HighGrayLevelRunEmphasis         |
| original | glrlm      | RunLengthNonUniformityNormalized |
| original | glszm      | GrayLevelVariance                |
| original | glszm      | ZoneVariance                     |
| original | glszm      | GrayLevelNonUniformityNormalized |
| original | glszm      | SizeZoneNonUniformityNormalized  |
| original | glszm      | SizeZoneNonUniformity            |
| original | glszm      | GrayLevelNonUniformity           |
| original | glszm      | LargeAreaEmphasis                |
| original | glszm      | SmallAreaHighGrayLevelEmphasis   |
| original | glszm      | ZonePercentage                   |

|             |       |                                      |
|-------------|-------|--------------------------------------|
| original    | glszm | LargeAreaLowGrayLevelEmphasis        |
| original    | glszm | LargeAreaHighGrayLevelEmphasis       |
| original    | glszm | HighGrayLevelZoneEmphasis            |
| original    | glszm | SmallAreaEmphasis                    |
| original    | glszm | LowGrayLevelZoneEmphasis             |
| original    | glszm | ZoneEntropy                          |
| original    | glszm | SmallAreaLowGrayLevelEmphasis        |
| original    | ngtdm | Coarseness                           |
| original    | ngtdm | Complexity                           |
| original    | ngtdm | Strength                             |
| original    | ngtdm | Contrast                             |
| original    | ngtdm | Busyness                             |
| wavelet-HHH | gldm  | GrayLevelVariance                    |
| wavelet-HHH | gldm  | HighGrayLevelEmphasis                |
| wavelet-HHH | gldm  | DependenceEntropy                    |
| wavelet-HHH | gldm  | DependenceNonUniformity              |
| wavelet-HHH | gldm  | GrayLevelNonUniformity               |
| wavelet-HHH | gldm  | SmallDependenceEmphasis              |
| wavelet-HHH | gldm  | SmallDependenceHighGrayLevelEmphasis |
| wavelet-HHH | gldm  | DependenceNonUniformityNormalized    |
| wavelet-HHH | gldm  | LargeDependenceEmphasis              |
| wavelet-HHH | gldm  | LargeDependenceLowGrayLevelEmphasis  |
| wavelet-HHH | gldm  | DependenceVariance                   |
| wavelet-HHH | gldm  | LargeDependenceHighGrayLevelEmphasis |
| wavelet-HHH | gldm  | SmallDependenceLowGrayLevelEmphasis  |
| wavelet-HHH | gldm  | LowGrayLevelEmphasis                 |
| wavelet-HHH | glcm  | JointAverage                         |
| wavelet-HHH | glcm  | SumAverage                           |
| wavelet-HHH | glcm  | JointEntropy                         |
| wavelet-HHH | glcm  | ClusterShade                         |
| wavelet-HHH | glcm  | MaximumProbability                   |
| wavelet-HHH | glcm  | Idmn                                 |
| wavelet-HHH | glcm  | JointEnergy                          |
| wavelet-HHH | glcm  | Contrast                             |
| wavelet-HHH | glcm  | DifferenceEntropy                    |
| wavelet-HHH | glcm  | InverseVariance                      |
| wavelet-HHH | glcm  | DifferenceVariance                   |
| wavelet-HHH | glcm  | Idn                                  |
| wavelet-HHH | glcm  | Idm                                  |
| wavelet-HHH | glcm  | Correlation                          |
| wavelet-HHH | glcm  | Autocorrelation                      |
| wavelet-HHH | glcm  | SumEntropy                           |
| wavelet-HHH | glcm  | SumSquares                           |
| wavelet-HHH | glcm  | ClusterProminence                    |
| wavelet-HHH | glcm  | Imc2                                 |
| wavelet-HHH | glcm  | Imc1                                 |
| wavelet-HHH | glcm  | DifferenceAverage                    |

|             |            |                                  |
|-------------|------------|----------------------------------|
| wavelet-HHH | glcm       | Id                               |
| wavelet-HHH | glcm       | ClusterTendency                  |
| wavelet-HHH | firstorder | InterquartileRange               |
| wavelet-HHH | firstorder | Skewness                         |
| wavelet-HHH | firstorder | Uniformity                       |
| wavelet-HHH | firstorder | Median                           |
| wavelet-HHH | firstorder | Energy                           |
| wavelet-HHH | firstorder | RobustMeanAbsoluteDeviation      |
| wavelet-HHH | firstorder | MeanAbsoluteDeviation            |
| wavelet-HHH | firstorder | TotalEnergy                      |
| wavelet-HHH | firstorder | Maximum                          |
| wavelet-HHH | firstorder | RootMeanSquared                  |
| wavelet-HHH | firstorder | 90Percentile                     |
| wavelet-HHH | firstorder | Minimum                          |
| wavelet-HHH | firstorder | Entropy                          |
| wavelet-HHH | firstorder | Range                            |
| wavelet-HHH | firstorder | Variance                         |
| wavelet-HHH | firstorder | 10Percentile                     |
| wavelet-HHH | firstorder | Kurtosis                         |
| wavelet-HHH | firstorder | Mean                             |
| wavelet-HHH | glrlm      | ShortRunLowGrayLevelEmphasis     |
| wavelet-HHH | glrlm      | GrayLevelVariance                |
| wavelet-HHH | glrlm      | LowGrayLevelRunEmphasis          |
| wavelet-HHH | glrlm      | GrayLevelNonUniformityNormalized |
| wavelet-HHH | glrlm      | RunVariance                      |
| wavelet-HHH | glrlm      | GrayLevelNonUniformity           |
| wavelet-HHH | glrlm      | LongRunEmphasis                  |
| wavelet-HHH | glrlm      | ShortRunHighGrayLevelEmphasis    |
| wavelet-HHH | glrlm      | RunLengthNonUniformity           |
| wavelet-HHH | glrlm      | ShortRunEmphasis                 |
| wavelet-HHH | glrlm      | LongRunHighGrayLevelEmphasis     |
| wavelet-HHH | glrlm      | RunPercentage                    |
| wavelet-HHH | glrlm      | LongRunLowGrayLevelEmphasis      |
| wavelet-HHH | glrlm      | RunEntropy                       |
| wavelet-HHH | glrlm      | HighGrayLevelRunEmphasis         |
| wavelet-HHH | glrlm      | RunLengthNonUniformityNormalized |
| wavelet-HHH | glszm      | GrayLevelVariance                |
| wavelet-HHH | glszm      | ZoneVariance                     |
| wavelet-HHH | glszm      | GrayLevelNonUniformityNormalized |
| wavelet-HHH | glszm      | SizeZoneNonUniformityNormalized  |
| wavelet-HHH | glszm      | SizeZoneNonUniformity            |
| wavelet-HHH | glszm      | GrayLevelNonUniformity           |
| wavelet-HHH | glszm      | LargeAreaEmphasis                |
| wavelet-HHH | glszm      | SmallAreaHighGrayLevelEmphasis   |
| wavelet-HHH | glszm      | ZonePercentage                   |
| wavelet-HHH | glszm      | LargeAreaLowGrayLevelEmphasis    |
| wavelet-HHH | glszm      | LargeAreaHighGrayLevelEmphasis   |

|             |       |                                      |
|-------------|-------|--------------------------------------|
| wavelet-HHH | glszm | HighGrayLevelZoneEmphasis            |
| wavelet-HHH | glszm | SmallAreaEmphasis                    |
| wavelet-HHH | glszm | LowGrayLevelZoneEmphasis             |
| wavelet-HHH | glszm | ZoneEntropy                          |
| wavelet-HHH | glszm | SmallAreaLowGrayLevelEmphasis        |
| wavelet-HHH | ngtdm | Coarseness                           |
| wavelet-HHH | ngtdm | Complexity                           |
| wavelet-HHH | ngtdm | Strength                             |
| wavelet-HHH | ngtdm | Contrast                             |
| wavelet-HHH | ngtdm | Busyness                             |
| wavelet-HLL | gldm  | GrayLevelVariance                    |
| wavelet-HLL | gldm  | HighGrayLevelEmphasis                |
| wavelet-HLL | gldm  | DependenceEntropy                    |
| wavelet-HLL | gldm  | DependenceNonUniformity              |
| wavelet-HLL | gldm  | GrayLevelNonUniformity               |
| wavelet-HLL | gldm  | SmallDependenceEmphasis              |
| wavelet-HLL | gldm  | SmallDependenceHighGrayLevelEmphasis |
| wavelet-HLL | gldm  | DependenceNonUniformityNormalized    |
| wavelet-HLL | gldm  | LargeDependenceEmphasis              |
| wavelet-HLL | gldm  | LargeDependenceLowGrayLevelEmphasis  |
| wavelet-HLL | gldm  | DependenceVariance                   |
| wavelet-HLL | gldm  | LargeDependenceHighGrayLevelEmphasis |
| wavelet-HLL | gldm  | SmallDependenceLowGrayLevelEmphasis  |
| wavelet-HLL | gldm  | LowGrayLevelEmphasis                 |
| wavelet-HLL | glcm  | JointAverage                         |
| wavelet-HLL | glcm  | SumAverage                           |
| wavelet-HLL | glcm  | JointEntropy                         |
| wavelet-HLL | glcm  | ClusterShade                         |
| wavelet-HLL | glcm  | MaximumProbability                   |
| wavelet-HLL | glcm  | ldmn                                 |
| wavelet-HLL | glcm  | JointEnergy                          |
| wavelet-HLL | glcm  | Contrast                             |
| wavelet-HLL | glcm  | DifferenceEntropy                    |
| wavelet-HLL | glcm  | InverseVariance                      |
| wavelet-HLL | glcm  | DifferenceVariance                   |
| wavelet-HLL | glcm  | ldn                                  |
| wavelet-HLL | glcm  | ldm                                  |
| wavelet-HLL | glcm  | Correlation                          |
| wavelet-HLL | glcm  | Autocorrelation                      |
| wavelet-HLL | glcm  | SumEntropy                           |
| wavelet-HLL | glcm  | SumSquares                           |
| wavelet-HLL | glcm  | ClusterProminence                    |
| wavelet-HLL | glcm  | lmc2                                 |
| wavelet-HLL | glcm  | lmc1                                 |
| wavelet-HLL | glcm  | DifferenceAverage                    |
| wavelet-HLL | glcm  | ld                                   |
| wavelet-HLL | glcm  | ClusterTendency                      |

|             |            |                                  |
|-------------|------------|----------------------------------|
| wavelet-HLL | firstorder | InterquartileRange               |
| wavelet-HLL | firstorder | Skewness                         |
| wavelet-HLL | firstorder | Uniformity                       |
| wavelet-HLL | firstorder | Median                           |
| wavelet-HLL | firstorder | Energy                           |
| wavelet-HLL | firstorder | RobustMeanAbsoluteDeviation      |
| wavelet-HLL | firstorder | MeanAbsoluteDeviation            |
| wavelet-HLL | firstorder | TotalEnergy                      |
| wavelet-HLL | firstorder | Maximum                          |
| wavelet-HLL | firstorder | RootMeanSquared                  |
| wavelet-HLL | firstorder | 90Percentile                     |
| wavelet-HLL | firstorder | Minimum                          |
| wavelet-HLL | firstorder | Entropy                          |
| wavelet-HLL | firstorder | Range                            |
| wavelet-HLL | firstorder | Variance                         |
| wavelet-HLL | firstorder | 10Percentile                     |
| wavelet-HLL | firstorder | Kurtosis                         |
| wavelet-HLL | firstorder | Mean                             |
| wavelet-HLL | glrlm      | ShortRunLowGrayLevelEmphasis     |
| wavelet-HLL | glrlm      | GrayLevelVariance                |
| wavelet-HLL | glrlm      | LowGrayLevelRunEmphasis          |
| wavelet-HLL | glrlm      | GrayLevelNonUniformityNormalized |
| wavelet-HLL | glrlm      | RunVariance                      |
| wavelet-HLL | glrlm      | GrayLevelNonUniformity           |
| wavelet-HLL | glrlm      | LongRunEmphasis                  |
| wavelet-HLL | glrlm      | ShortRunHighGrayLevelEmphasis    |
| wavelet-HLL | glrlm      | RunLengthNonUniformity           |
| wavelet-HLL | glrlm      | ShortRunEmphasis                 |
| wavelet-HLL | glrlm      | LongRunHighGrayLevelEmphasis     |
| wavelet-HLL | glrlm      | RunPercentage                    |
| wavelet-HLL | glrlm      | LongRunLowGrayLevelEmphasis      |
| wavelet-HLL | glrlm      | RunEntropy                       |
| wavelet-HLL | glrlm      | HighGrayLevelRunEmphasis         |
| wavelet-HLL | glrlm      | RunLengthNonUniformityNormalized |
| wavelet-HLL | glszm      | GrayLevelVariance                |
| wavelet-HLL | glszm      | ZoneVariance                     |
| wavelet-HLL | glszm      | GrayLevelNonUniformityNormalized |
| wavelet-HLL | glszm      | SizeZoneNonUniformityNormalized  |
| wavelet-HLL | glszm      | SizeZoneNonUniformity            |
| wavelet-HLL | glszm      | GrayLevelNonUniformity           |
| wavelet-HLL | glszm      | LargeAreaEmphasis                |
| wavelet-HLL | glszm      | SmallAreaHighGrayLevelEmphasis   |
| wavelet-HLL | glszm      | ZonePercentage                   |
| wavelet-HLL | glszm      | LargeAreaLowGrayLevelEmphasis    |
| wavelet-HLL | glszm      | LargeAreaHighGrayLevelEmphasis   |
| wavelet-HLL | glszm      | HighGrayLevelZoneEmphasis        |
| wavelet-HLL | glszm      | SmallAreaEmphasis                |

|             |            |                                      |
|-------------|------------|--------------------------------------|
| wavelet-HLL | glszm      | LowGrayLevelZoneEmphasis             |
| wavelet-HLL | glszm      | ZoneEntropy                          |
| wavelet-HLL | glszm      | SmallAreaLowGrayLevelEmphasis        |
| wavelet-HLL | ngtdm      | Coarseness                           |
| wavelet-HLL | ngtdm      | Complexity                           |
| wavelet-HLL | ngtdm      | Strength                             |
| wavelet-HLL | ngtdm      | Contrast                             |
| wavelet-HLL | ngtdm      | Busyness                             |
| wavelet-LHL | gldm       | GrayLevelVariance                    |
| wavelet-LHL | gldm       | HighGrayLevelEmphasis                |
| wavelet-LHL | gldm       | DependenceEntropy                    |
| wavelet-LHL | gldm       | DependenceNonUniformity              |
| wavelet-LHL | gldm       | GrayLevelNonUniformity               |
| wavelet-LHL | gldm       | SmallDependenceEmphasis              |
| wavelet-LHL | gldm       | SmallDependenceHighGrayLevelEmphasis |
| wavelet-LHL | gldm       | DependenceNonUniformityNormalized    |
| wavelet-LHL | gldm       | LargeDependenceEmphasis              |
| wavelet-LHL | gldm       | LargeDependenceLowGrayLevelEmphasis  |
| wavelet-LHL | gldm       | DependenceVariance                   |
| wavelet-LHL | gldm       | LargeDependenceHighGrayLevelEmphasis |
| wavelet-LHL | gldm       | SmallDependenceLowGrayLevelEmphasis  |
| wavelet-LHL | gldm       | LowGrayLevelEmphasis                 |
| wavelet-LHL | glcm       | JointAverage                         |
| wavelet-LHL | glcm       | SumAverage                           |
| wavelet-LHL | glcm       | JointEntropy                         |
| wavelet-LHL | glcm       | ClusterShade                         |
| wavelet-LHL | glcm       | MaximumProbability                   |
| wavelet-LHL | glcm       | ldmn                                 |
| wavelet-LHL | glcm       | JointEnergy                          |
| wavelet-LHL | glcm       | Contrast                             |
| wavelet-LHL | glcm       | DifferenceEntropy                    |
| wavelet-LHL | glcm       | InverseVariance                      |
| wavelet-LHL | glcm       | DifferenceVariance                   |
| wavelet-LHL | glcm       | ldn                                  |
| wavelet-LHL | glcm       | ldm                                  |
| wavelet-LHL | glcm       | Correlation                          |
| wavelet-LHL | glcm       | Autocorrelation                      |
| wavelet-LHL | glcm       | SumEntropy                           |
| wavelet-LHL | glcm       | SumSquares                           |
| wavelet-LHL | glcm       | ClusterProminence                    |
| wavelet-LHL | glcm       | lmc2                                 |
| wavelet-LHL | glcm       | lmc1                                 |
| wavelet-LHL | glcm       | DifferenceAverage                    |
| wavelet-LHL | glcm       | ld                                   |
| wavelet-LHL | glcm       | ClusterTendency                      |
| wavelet-LHL | firstorder | InterquartileRange                   |
| wavelet-LHL | firstorder | Skewness                             |

|             |            |                                  |
|-------------|------------|----------------------------------|
| wavelet-LHL | firstorder | Uniformity                       |
| wavelet-LHL | firstorder | Median                           |
| wavelet-LHL | firstorder | Energy                           |
| wavelet-LHL | firstorder | RobustMeanAbsoluteDeviation      |
| wavelet-LHL | firstorder | MeanAbsoluteDeviation            |
| wavelet-LHL | firstorder | TotalEnergy                      |
| wavelet-LHL | firstorder | Maximum                          |
| wavelet-LHL | firstorder | RootMeanSquared                  |
| wavelet-LHL | firstorder | 90Percentile                     |
| wavelet-LHL | firstorder | Minimum                          |
| wavelet-LHL | firstorder | Entropy                          |
| wavelet-LHL | firstorder | Range                            |
| wavelet-LHL | firstorder | Variance                         |
| wavelet-LHL | firstorder | 10Percentile                     |
| wavelet-LHL | firstorder | Kurtosis                         |
| wavelet-LHL | firstorder | Mean                             |
| wavelet-LHL | glrlm      | ShortRunLowGrayLevelEmphasis     |
| wavelet-LHL | glrlm      | GrayLevelVariance                |
| wavelet-LHL | glrlm      | LowGrayLevelRunEmphasis          |
| wavelet-LHL | glrlm      | GrayLevelNonUniformityNormalized |
| wavelet-LHL | glrlm      | RunVariance                      |
| wavelet-LHL | glrlm      | GrayLevelNonUniformity           |
| wavelet-LHL | glrlm      | LongRunEmphasis                  |
| wavelet-LHL | glrlm      | ShortRunHighGrayLevelEmphasis    |
| wavelet-LHL | glrlm      | RunLengthNonUniformity           |
| wavelet-LHL | glrlm      | ShortRunEmphasis                 |
| wavelet-LHL | glrlm      | LongRunHighGrayLevelEmphasis     |
| wavelet-LHL | glrlm      | RunPercentage                    |
| wavelet-LHL | glrlm      | LongRunLowGrayLevelEmphasis      |
| wavelet-LHL | glrlm      | RunEntropy                       |
| wavelet-LHL | glrlm      | HighGrayLevelRunEmphasis         |
| wavelet-LHL | glrlm      | RunLengthNonUniformityNormalized |
| wavelet-LHL | glszm      | GrayLevelVariance                |
| wavelet-LHL | glszm      | ZoneVariance                     |
| wavelet-LHL | glszm      | GrayLevelNonUniformityNormalized |
| wavelet-LHL | glszm      | SizeZoneNonUniformityNormalized  |
| wavelet-LHL | glszm      | SizeZoneNonUniformity            |
| wavelet-LHL | glszm      | GrayLevelNonUniformity           |
| wavelet-LHL | glszm      | LargeAreaEmphasis                |
| wavelet-LHL | glszm      | SmallAreaHighGrayLevelEmphasis   |
| wavelet-LHL | glszm      | ZonePercentage                   |
| wavelet-LHL | glszm      | LargeAreaLowGrayLevelEmphasis    |
| wavelet-LHL | glszm      | LargeAreaHighGrayLevelEmphasis   |
| wavelet-LHL | glszm      | HighGrayLevelZoneEmphasis        |
| wavelet-LHL | glszm      | SmallAreaEmphasis                |
| wavelet-LHL | glszm      | LowGrayLevelZoneEmphasis         |
| wavelet-LHL | glszm      | ZoneEntropy                      |



|             |            |                                      |
|-------------|------------|--------------------------------------|
| wavelet-LHL | glszm      | SmallAreaLowGrayLevelEmphasis        |
| wavelet-LHL | ngtdm      | Coarseness                           |
| wavelet-LHL | ngtdm      | Complexity                           |
| wavelet-LHL | ngtdm      | Strength                             |
| wavelet-LHL | ngtdm      | Contrast                             |
| wavelet-LHL | ngtdm      | Busyness                             |
| wavelet-LHH | gldm       | GrayLevelVariance                    |
| wavelet-LHH | gldm       | HighGrayLevelEmphasis                |
| wavelet-LHH | gldm       | DependenceEntropy                    |
| wavelet-LHH | gldm       | DependenceNonUniformity              |
| wavelet-LHH | gldm       | GrayLevelNonUniformity               |
| wavelet-LHH | gldm       | SmallDependenceEmphasis              |
| wavelet-LHH | gldm       | SmallDependenceHighGrayLevelEmphasis |
| wavelet-LHH | gldm       | DependenceNonUniformityNormalized    |
| wavelet-LHH | gldm       | LargeDependenceEmphasis              |
| wavelet-LHH | gldm       | LargeDependenceLowGrayLevelEmphasis  |
| wavelet-LHH | gldm       | DependenceVariance                   |
| wavelet-LHH | gldm       | LargeDependenceHighGrayLevelEmphasis |
| wavelet-LHH | gldm       | SmallDependenceLowGrayLevelEmphasis  |
| wavelet-LHH | gldm       | LowGrayLevelEmphasis                 |
| wavelet-LHH | glcm       | JointAverage                         |
| wavelet-LHH | glcm       | SumAverage                           |
| wavelet-LHH | glcm       | JointEntropy                         |
| wavelet-LHH | glcm       | ClusterShade                         |
| wavelet-LHH | glcm       | MaximumProbability                   |
| wavelet-LHH | glcm       | ldmn                                 |
| wavelet-LHH | glcm       | JointEnergy                          |
| wavelet-LHH | glcm       | Contrast                             |
| wavelet-LHH | glcm       | DifferenceEntropy                    |
| wavelet-LHH | glcm       | InverseVariance                      |
| wavelet-LHH | glcm       | DifferenceVariance                   |
| wavelet-LHH | glcm       | ldn                                  |
| wavelet-LHH | glcm       | ldm                                  |
| wavelet-LHH | glcm       | Correlation                          |
| wavelet-LHH | glcm       | Autocorrelation                      |
| wavelet-LHH | glcm       | SumEntropy                           |
| wavelet-LHH | glcm       | SumSquares                           |
| wavelet-LHH | glcm       | ClusterProminence                    |
| wavelet-LHH | glcm       | lmc2                                 |
| wavelet-LHH | glcm       | lmc1                                 |
| wavelet-LHH | glcm       | DifferenceAverage                    |
| wavelet-LHH | glcm       | ld                                   |
| wavelet-LHH | glcm       | ClusterTendency                      |
| wavelet-LHH | firstorder | InterquartileRange                   |
| wavelet-LHH | firstorder | Skewness                             |
| wavelet-LHH | firstorder | Uniformity                           |
| wavelet-LHH | firstorder | Median                               |

|             |            |                                  |
|-------------|------------|----------------------------------|
| wavelet-LHH | firstorder | Energy                           |
| wavelet-LHH | firstorder | RobustMeanAbsoluteDeviation      |
| wavelet-LHH | firstorder | MeanAbsoluteDeviation            |
| wavelet-LHH | firstorder | TotalEnergy                      |
| wavelet-LHH | firstorder | Maximum                          |
| wavelet-LHH | firstorder | RootMeanSquared                  |
| wavelet-LHH | firstorder | 90Percentile                     |
| wavelet-LHH | firstorder | Minimum                          |
| wavelet-LHH | firstorder | Entropy                          |
| wavelet-LHH | firstorder | Range                            |
| wavelet-LHH | firstorder | Variance                         |
| wavelet-LHH | firstorder | 10Percentile                     |
| wavelet-LHH | firstorder | Kurtosis                         |
| wavelet-LHH | firstorder | Mean                             |
| wavelet-LHH | glrlm      | ShortRunLowGrayLevelEmphasis     |
| wavelet-LHH | glrlm      | GrayLevelVariance                |
| wavelet-LHH | glrlm      | LowGrayLevelRunEmphasis          |
| wavelet-LHH | glrlm      | GrayLevelNonUniformityNormalized |
| wavelet-LHH | glrlm      | RunVariance                      |
| wavelet-LHH | glrlm      | GrayLevelNonUniformity           |
| wavelet-LHH | glrlm      | LongRunEmphasis                  |
| wavelet-LHH | glrlm      | ShortRunHighGrayLevelEmphasis    |
| wavelet-LHH | glrlm      | RunLengthNonUniformity           |
| wavelet-LHH | glrlm      | ShortRunEmphasis                 |
| wavelet-LHH | glrlm      | LongRunHighGrayLevelEmphasis     |
| wavelet-LHH | glrlm      | RunPercentage                    |
| wavelet-LHH | glrlm      | LongRunLowGrayLevelEmphasis      |
| wavelet-LHH | glrlm      | RunEntropy                       |
| wavelet-LHH | glrlm      | HighGrayLevelRunEmphasis         |
| wavelet-LHH | glrlm      | RunLengthNonUniformityNormalized |
| wavelet-LHH | glszm      | GrayLevelVariance                |
| wavelet-LHH | glszm      | ZoneVariance                     |
| wavelet-LHH | glszm      | GrayLevelNonUniformityNormalized |
| wavelet-LHH | glszm      | SizeZoneNonUniformityNormalized  |
| wavelet-LHH | glszm      | SizeZoneNonUniformity            |
| wavelet-LHH | glszm      | GrayLevelNonUniformity           |
| wavelet-LHH | glszm      | LargeAreaEmphasis                |
| wavelet-LHH | glszm      | SmallAreaHighGrayLevelEmphasis   |
| wavelet-LHH | glszm      | ZonePercentage                   |
| wavelet-LHH | glszm      | LargeAreaLowGrayLevelEmphasis    |
| wavelet-LHH | glszm      | LargeAreaHighGrayLevelEmphasis   |
| wavelet-LHH | glszm      | HighGrayLevelZoneEmphasis        |
| wavelet-LHH | glszm      | SmallAreaEmphasis                |
| wavelet-LHH | glszm      | LowGrayLevelZoneEmphasis         |
| wavelet-LHH | glszm      | ZoneEntropy                      |
| wavelet-LHH | glszm      | SmallAreaLowGrayLevelEmphasis    |
| wavelet-LHH | ngtdm      | Coarseness                       |

|             |            |                                      |
|-------------|------------|--------------------------------------|
| wavelet-LHH | ngtdm      | Complexity                           |
| wavelet-LHH | ngtdm      | Strength                             |
| wavelet-LHH | ngtdm      | Contrast                             |
| wavelet-LHH | ngtdm      | Busyness                             |
| wavelet-LLH | gldm       | GrayLevelVariance                    |
| wavelet-LLH | gldm       | HighGrayLevelEmphasis                |
| wavelet-LLH | gldm       | DependenceEntropy                    |
| wavelet-LLH | gldm       | DependenceNonUniformity              |
| wavelet-LLH | gldm       | GrayLevelNonUniformity               |
| wavelet-LLH | gldm       | SmallDependenceEmphasis              |
| wavelet-LLH | gldm       | SmallDependenceHighGrayLevelEmphasis |
| wavelet-LLH | gldm       | DependenceNonUniformityNormalized    |
| wavelet-LLH | gldm       | LargeDependenceEmphasis              |
| wavelet-LLH | gldm       | LargeDependenceLowGrayLevelEmphasis  |
| wavelet-LLH | gldm       | DependenceVariance                   |
| wavelet-LLH | gldm       | LargeDependenceHighGrayLevelEmphasis |
| wavelet-LLH | gldm       | SmallDependenceLowGrayLevelEmphasis  |
| wavelet-LLH | gldm       | LowGrayLevelEmphasis                 |
| wavelet-LLH | glcm       | JointAverage                         |
| wavelet-LLH | glcm       | SumAverage                           |
| wavelet-LLH | glcm       | JointEntropy                         |
| wavelet-LLH | glcm       | ClusterShade                         |
| wavelet-LLH | glcm       | MaximumProbability                   |
| wavelet-LLH | glcm       | Idmn                                 |
| wavelet-LLH | glcm       | JointEnergy                          |
| wavelet-LLH | glcm       | Contrast                             |
| wavelet-LLH | glcm       | DifferenceEntropy                    |
| wavelet-LLH | glcm       | InverseVariance                      |
| wavelet-LLH | glcm       | DifferenceVariance                   |
| wavelet-LLH | glcm       | Idn                                  |
| wavelet-LLH | glcm       | Idm                                  |
| wavelet-LLH | glcm       | Correlation                          |
| wavelet-LLH | glcm       | Autocorrelation                      |
| wavelet-LLH | glcm       | SumEntropy                           |
| wavelet-LLH | glcm       | SumSquares                           |
| wavelet-LLH | glcm       | ClusterProminence                    |
| wavelet-LLH | glcm       | Imc2                                 |
| wavelet-LLH | glcm       | Imc1                                 |
| wavelet-LLH | glcm       | DifferenceAverage                    |
| wavelet-LLH | glcm       | Id                                   |
| wavelet-LLH | glcm       | ClusterTendency                      |
| wavelet-LLH | firstorder | InterquartileRange                   |
| wavelet-LLH | firstorder | Skewness                             |
| wavelet-LLH | firstorder | Uniformity                           |
| wavelet-LLH | firstorder | Median                               |
| wavelet-LLH | firstorder | Energy                               |
| wavelet-LLH | firstorder | RobustMeanAbsoluteDeviation          |

|             |            |                                  |
|-------------|------------|----------------------------------|
| wavelet-LLH | firstorder | MeanAbsoluteDeviation            |
| wavelet-LLH | firstorder | TotalEnergy                      |
| wavelet-LLH | firstorder | Maximum                          |
| wavelet-LLH | firstorder | RootMeanSquared                  |
| wavelet-LLH | firstorder | 90Percentile                     |
| wavelet-LLH | firstorder | Minimum                          |
| wavelet-LLH | firstorder | Entropy                          |
| wavelet-LLH | firstorder | Range                            |
| wavelet-LLH | firstorder | Variance                         |
| wavelet-LLH | firstorder | 10Percentile                     |
| wavelet-LLH | firstorder | Kurtosis                         |
| wavelet-LLH | firstorder | Mean                             |
| wavelet-LLH | glrlm      | ShortRunLowGrayLevelEmphasis     |
| wavelet-LLH | glrlm      | GrayLevelVariance                |
| wavelet-LLH | glrlm      | LowGrayLevelRunEmphasis          |
| wavelet-LLH | glrlm      | GrayLevelNonUniformityNormalized |
| wavelet-LLH | glrlm      | RunVariance                      |
| wavelet-LLH | glrlm      | GrayLevelNonUniformity           |
| wavelet-LLH | glrlm      | LongRunEmphasis                  |
| wavelet-LLH | glrlm      | ShortRunHighGrayLevelEmphasis    |
| wavelet-LLH | glrlm      | RunLengthNonUniformity           |
| wavelet-LLH | glrlm      | ShortRunEmphasis                 |
| wavelet-LLH | glrlm      | LongRunHighGrayLevelEmphasis     |
| wavelet-LLH | glrlm      | RunPercentage                    |
| wavelet-LLH | glrlm      | LongRunLowGrayLevelEmphasis      |
| wavelet-LLH | glrlm      | RunEntropy                       |
| wavelet-LLH | glrlm      | HighGrayLevelRunEmphasis         |
| wavelet-LLH | glrlm      | RunLengthNonUniformityNormalized |
| wavelet-LLH | glszm      | GrayLevelVariance                |
| wavelet-LLH | glszm      | ZoneVariance                     |
| wavelet-LLH | glszm      | GrayLevelNonUniformityNormalized |
| wavelet-LLH | glszm      | SizeZoneNonUniformityNormalized  |
| wavelet-LLH | glszm      | SizeZoneNonUniformity            |
| wavelet-LLH | glszm      | GrayLevelNonUniformity           |
| wavelet-LLH | glszm      | LargeAreaEmphasis                |
| wavelet-LLH | glszm      | SmallAreaHighGrayLevelEmphasis   |
| wavelet-LLH | glszm      | ZonePercentage                   |
| wavelet-LLH | glszm      | LargeAreaLowGrayLevelEmphasis    |
| wavelet-LLH | glszm      | LargeAreaHighGrayLevelEmphasis   |
| wavelet-LLH | glszm      | HighGrayLevelZoneEmphasis        |
| wavelet-LLH | glszm      | SmallAreaEmphasis                |
| wavelet-LLH | glszm      | LowGrayLevelZoneEmphasis         |
| wavelet-LLH | glszm      | ZoneEntropy                      |
| wavelet-LLH | glszm      | SmallAreaLowGrayLevelEmphasis    |
| wavelet-LLH | ngtdm      | Coarseness                       |
| wavelet-LLH | ngtdm      | Complexity                       |
| wavelet-LLH | ngtdm      | Strength                         |

|             |            |                                      |
|-------------|------------|--------------------------------------|
| wavelet-LLH | ngtdm      | Contrast                             |
| wavelet-LLH | ngtdm      | Busyness                             |
| wavelet-LLL | gldm       | GrayLevelVariance                    |
| wavelet-LLL | gldm       | HighGrayLevelEmphasis                |
| wavelet-LLL | gldm       | DependenceEntropy                    |
| wavelet-LLL | gldm       | DependenceNonUniformity              |
| wavelet-LLL | gldm       | GrayLevelNonUniformity               |
| wavelet-LLL | gldm       | SmallDependenceEmphasis              |
| wavelet-LLL | gldm       | SmallDependenceHighGrayLevelEmphasis |
| wavelet-LLL | gldm       | DependenceNonUniformityNormalized    |
| wavelet-LLL | gldm       | LargeDependenceEmphasis              |
| wavelet-LLL | gldm       | LargeDependenceLowGrayLevelEmphasis  |
| wavelet-LLL | gldm       | DependenceVariance                   |
| wavelet-LLL | gldm       | LargeDependenceHighGrayLevelEmphasis |
| wavelet-LLL | gldm       | SmallDependenceLowGrayLevelEmphasis  |
| wavelet-LLL | gldm       | LowGrayLevelEmphasis                 |
| wavelet-LLL | glcm       | JointAverage                         |
| wavelet-LLL | glcm       | SumAverage                           |
| wavelet-LLL | glcm       | JointEntropy                         |
| wavelet-LLL | glcm       | ClusterShade                         |
| wavelet-LLL | glcm       | MaximumProbability                   |
| wavelet-LLL | glcm       | ldmn                                 |
| wavelet-LLL | glcm       | JointEnergy                          |
| wavelet-LLL | glcm       | Contrast                             |
| wavelet-LLL | glcm       | DifferenceEntropy                    |
| wavelet-LLL | glcm       | InverseVariance                      |
| wavelet-LLL | glcm       | DifferenceVariance                   |
| wavelet-LLL | glcm       | ldn                                  |
| wavelet-LLL | glcm       | ldm                                  |
| wavelet-LLL | glcm       | Correlation                          |
| wavelet-LLL | glcm       | Autocorrelation                      |
| wavelet-LLL | glcm       | SumEntropy                           |
| wavelet-LLL | glcm       | SumSquares                           |
| wavelet-LLL | glcm       | ClusterProminence                    |
| wavelet-LLL | glcm       | lmc2                                 |
| wavelet-LLL | glcm       | lmc1                                 |
| wavelet-LLL | glcm       | DifferenceAverage                    |
| wavelet-LLL | glcm       | ld                                   |
| wavelet-LLL | glcm       | ClusterTendency                      |
| wavelet-LLL | firstorder | InterquartileRange                   |
| wavelet-LLL | firstorder | Skewness                             |
| wavelet-LLL | firstorder | Uniformity                           |
| wavelet-LLL | firstorder | Median                               |
| wavelet-LLL | firstorder | Energy                               |
| wavelet-LLL | firstorder | RobustMeanAbsoluteDeviation          |
| wavelet-LLL | firstorder | MeanAbsoluteDeviation                |
| wavelet-LLL | firstorder | TotalEnergy                          |

|             |            |                                  |
|-------------|------------|----------------------------------|
| wavelet-LLL | firstorder | Maximum                          |
| wavelet-LLL | firstorder | RootMeanSquared                  |
| wavelet-LLL | firstorder | 90Percentile                     |
| wavelet-LLL | firstorder | Minimum                          |
| wavelet-LLL | firstorder | Entropy                          |
| wavelet-LLL | firstorder | Range                            |
| wavelet-LLL | firstorder | Variance                         |
| wavelet-LLL | firstorder | 10Percentile                     |
| wavelet-LLL | firstorder | Kurtosis                         |
| wavelet-LLL | firstorder | Mean                             |
| wavelet-LLL | glrlm      | ShortRunLowGrayLevelEmphasis     |
| wavelet-LLL | glrlm      | GrayLevelVariance                |
| wavelet-LLL | glrlm      | LowGrayLevelRunEmphasis          |
| wavelet-LLL | glrlm      | GrayLevelNonUniformityNormalized |
| wavelet-LLL | glrlm      | RunVariance                      |
| wavelet-LLL | glrlm      | GrayLevelNonUniformity           |
| wavelet-LLL | glrlm      | LongRunEmphasis                  |
| wavelet-LLL | glrlm      | ShortRunHighGrayLevelEmphasis    |
| wavelet-LLL | glrlm      | RunLengthNonUniformity           |
| wavelet-LLL | glrlm      | ShortRunEmphasis                 |
| wavelet-LLL | glrlm      | LongRunHighGrayLevelEmphasis     |
| wavelet-LLL | glrlm      | RunPercentage                    |
| wavelet-LLL | glrlm      | LongRunLowGrayLevelEmphasis      |
| wavelet-LLL | glrlm      | RunEntropy                       |
| wavelet-LLL | glrlm      | HighGrayLevelRunEmphasis         |
| wavelet-LLL | glrlm      | RunLengthNonUniformityNormalized |
| wavelet-LLL | glszm      | GrayLevelVariance                |
| wavelet-LLL | glszm      | ZoneVariance                     |
| wavelet-LLL | glszm      | GrayLevelNonUniformityNormalized |
| wavelet-LLL | glszm      | SizeZoneNonUniformityNormalized  |
| wavelet-LLL | glszm      | SizeZoneNonUniformity            |
| wavelet-LLL | glszm      | GrayLevelNonUniformity           |
| wavelet-LLL | glszm      | LargeAreaEmphasis                |
| wavelet-LLL | glszm      | SmallAreaHighGrayLevelEmphasis   |
| wavelet-LLL | glszm      | ZonePercentage                   |
| wavelet-LLL | glszm      | LargeAreaLowGrayLevelEmphasis    |
| wavelet-LLL | glszm      | LargeAreaHighGrayLevelEmphasis   |
| wavelet-LLL | glszm      | HighGrayLevelZoneEmphasis        |
| wavelet-LLL | glszm      | SmallAreaEmphasis                |
| wavelet-LLL | glszm      | LowGrayLevelZoneEmphasis         |
| wavelet-LLL | glszm      | ZoneEntropy                      |
| wavelet-LLL | glszm      | SmallAreaLowGrayLevelEmphasis    |
| wavelet-LLL | ngtdm      | Coarseness                       |
| wavelet-LLL | ngtdm      | Complexity                       |
| wavelet-LLL | ngtdm      | Strength                         |
| wavelet-LLL | ngtdm      | Contrast                         |
| wavelet-LLL | ngtdm      | Busyness                         |

|             |            |                                      |
|-------------|------------|--------------------------------------|
| wavelet-HHL | gldm       | GrayLevelVariance                    |
| wavelet-HHL | gldm       | HighGrayLevelEmphasis                |
| wavelet-HHL | gldm       | DependenceEntropy                    |
| wavelet-HHL | gldm       | DependenceNonUniformity              |
| wavelet-HHL | gldm       | GrayLevelNonUniformity               |
| wavelet-HHL | gldm       | SmallDependenceEmphasis              |
| wavelet-HHL | gldm       | SmallDependenceHighGrayLevelEmphasis |
| wavelet-HHL | gldm       | DependenceNonUniformityNormalized    |
| wavelet-HHL | gldm       | LargeDependenceEmphasis              |
| wavelet-HHL | gldm       | LargeDependenceLowGrayLevelEmphasis  |
| wavelet-HHL | gldm       | DependenceVariance                   |
| wavelet-HHL | gldm       | LargeDependenceHighGrayLevelEmphasis |
| wavelet-HHL | gldm       | SmallDependenceLowGrayLevelEmphasis  |
| wavelet-HHL | gldm       | LowGrayLevelEmphasis                 |
| wavelet-HHL | glcm       | JointAverage                         |
| wavelet-HHL | glcm       | SumAverage                           |
| wavelet-HHL | glcm       | JointEntropy                         |
| wavelet-HHL | glcm       | ClusterShade                         |
| wavelet-HHL | glcm       | MaximumProbability                   |
| wavelet-HHL | glcm       | Idmn                                 |
| wavelet-HHL | glcm       | JointEnergy                          |
| wavelet-HHL | glcm       | Contrast                             |
| wavelet-HHL | glcm       | DifferenceEntropy                    |
| wavelet-HHL | glcm       | InverseVariance                      |
| wavelet-HHL | glcm       | DifferenceVariance                   |
| wavelet-HHL | glcm       | Idn                                  |
| wavelet-HHL | glcm       | Idm                                  |
| wavelet-HHL | glcm       | Correlation                          |
| wavelet-HHL | glcm       | Autocorrelation                      |
| wavelet-HHL | glcm       | SumEntropy                           |
| wavelet-HHL | glcm       | SumSquares                           |
| wavelet-HHL | glcm       | ClusterProminence                    |
| wavelet-HHL | glcm       | Imc2                                 |
| wavelet-HHL | glcm       | Imc1                                 |
| wavelet-HHL | glcm       | DifferenceAverage                    |
| wavelet-HHL | glcm       | Id                                   |
| wavelet-HHL | glcm       | ClusterTendency                      |
| wavelet-HHL | firstorder | InterquartileRange                   |
| wavelet-HHL | firstorder | Skewness                             |
| wavelet-HHL | firstorder | Uniformity                           |
| wavelet-HHL | firstorder | Median                               |
| wavelet-HHL | firstorder | Energy                               |
| wavelet-HHL | firstorder | RobustMeanAbsoluteDeviation          |
| wavelet-HHL | firstorder | MeanAbsoluteDeviation                |
| wavelet-HHL | firstorder | TotalEnergy                          |
| wavelet-HHL | firstorder | Maximum                              |
| wavelet-HHL | firstorder | RootMeanSquared                      |

|             |            |                                  |
|-------------|------------|----------------------------------|
| wavelet-HHL | firstorder | 90Percentile                     |
| wavelet-HHL | firstorder | Minimum                          |
| wavelet-HHL | firstorder | Entropy                          |
| wavelet-HHL | firstorder | Range                            |
| wavelet-HHL | firstorder | Variance                         |
| wavelet-HHL | firstorder | 10Percentile                     |
| wavelet-HHL | firstorder | Kurtosis                         |
| wavelet-HHL | firstorder | Mean                             |
| wavelet-HHL | glrlm      | ShortRunLowGrayLevelEmphasis     |
| wavelet-HHL | glrlm      | GrayLevelVariance                |
| wavelet-HHL | glrlm      | LowGrayLevelRunEmphasis          |
| wavelet-HHL | glrlm      | GrayLevelNonUniformityNormalized |
| wavelet-HHL | glrlm      | RunVariance                      |
| wavelet-HHL | glrlm      | GrayLevelNonUniformity           |
| wavelet-HHL | glrlm      | LongRunEmphasis                  |
| wavelet-HHL | glrlm      | ShortRunHighGrayLevelEmphasis    |
| wavelet-HHL | glrlm      | RunLengthNonUniformity           |
| wavelet-HHL | glrlm      | ShortRunEmphasis                 |
| wavelet-HHL | glrlm      | LongRunHighGrayLevelEmphasis     |
| wavelet-HHL | glrlm      | RunPercentage                    |
| wavelet-HHL | glrlm      | LongRunLowGrayLevelEmphasis      |
| wavelet-HHL | glrlm      | RunEntropy                       |
| wavelet-HHL | glrlm      | HighGrayLevelRunEmphasis         |
| wavelet-HHL | glrlm      | RunLengthNonUniformityNormalized |
| wavelet-HHL | glszm      | GrayLevelVariance                |
| wavelet-HHL | glszm      | ZoneVariance                     |
| wavelet-HHL | glszm      | GrayLevelNonUniformityNormalized |
| wavelet-HHL | glszm      | SizeZoneNonUniformityNormalized  |
| wavelet-HHL | glszm      | SizeZoneNonUniformity            |
| wavelet-HHL | glszm      | GrayLevelNonUniformity           |
| wavelet-HHL | glszm      | LargeAreaEmphasis                |
| wavelet-HHL | glszm      | SmallAreaHighGrayLevelEmphasis   |
| wavelet-HHL | glszm      | ZonePercentage                   |
| wavelet-HHL | glszm      | LargeAreaLowGrayLevelEmphasis    |
| wavelet-HHL | glszm      | LargeAreaHighGrayLevelEmphasis   |
| wavelet-HHL | glszm      | HighGrayLevelZoneEmphasis        |
| wavelet-HHL | glszm      | SmallAreaEmphasis                |
| wavelet-HHL | glszm      | LowGrayLevelZoneEmphasis         |
| wavelet-HHL | glszm      | ZoneEntropy                      |
| wavelet-HHL | glszm      | SmallAreaLowGrayLevelEmphasis    |
| wavelet-HHL | ngtdm      | Coarseness                       |
| wavelet-HHL | ngtdm      | Complexity                       |
| wavelet-HHL | ngtdm      | Strength                         |
| wavelet-HHL | ngtdm      | Contrast                         |
| wavelet-HHL | ngtdm      | Busyness                         |
| wavelet-HHL | gldm       | GrayLevelVariance                |
| wavelet-HHL | gldm       | HighGrayLevelEmphasis            |



|             |            |                                      |
|-------------|------------|--------------------------------------|
| wavelet-HLH | gldm       | DependenceEntropy                    |
| wavelet-HLH | gldm       | DependenceNonUniformity              |
| wavelet-HLH | gldm       | GrayLevelNonUniformity               |
| wavelet-HLH | gldm       | SmallDependenceEmphasis              |
| wavelet-HLH | gldm       | SmallDependenceHighGrayLevelEmphasis |
| wavelet-HLH | gldm       | DependenceNonUniformityNormalized    |
| wavelet-HLH | gldm       | LargeDependenceEmphasis              |
| wavelet-HLH | gldm       | LargeDependenceLowGrayLevelEmphasis  |
| wavelet-HLH | gldm       | DependenceVariance                   |
| wavelet-HLH | gldm       | LargeDependenceHighGrayLevelEmphasis |
| wavelet-HLH | gldm       | SmallDependenceLowGrayLevelEmphasis  |
| wavelet-HLH | gldm       | LowGrayLevelEmphasis                 |
| wavelet-HLH | glcm       | JointAverage                         |
| wavelet-HLH | glcm       | SumAverage                           |
| wavelet-HLH | glcm       | JointEntropy                         |
| wavelet-HLH | glcm       | ClusterShade                         |
| wavelet-HLH | glcm       | MaximumProbability                   |
| wavelet-HLH | glcm       | Idmn                                 |
| wavelet-HLH | glcm       | JointEnergy                          |
| wavelet-HLH | glcm       | Contrast                             |
| wavelet-HLH | glcm       | DifferenceEntropy                    |
| wavelet-HLH | glcm       | InverseVariance                      |
| wavelet-HLH | glcm       | DifferenceVariance                   |
| wavelet-HLH | glcm       | Idn                                  |
| wavelet-HLH | glcm       | Idm                                  |
| wavelet-HLH | glcm       | Correlation                          |
| wavelet-HLH | glcm       | Autocorrelation                      |
| wavelet-HLH | glcm       | SumEntropy                           |
| wavelet-HLH | glcm       | SumSquares                           |
| wavelet-HLH | glcm       | ClusterProminence                    |
| wavelet-HLH | glcm       | Imc2                                 |
| wavelet-HLH | glcm       | Imc1                                 |
| wavelet-HLH | glcm       | DifferenceAverage                    |
| wavelet-HLH | glcm       | Id                                   |
| wavelet-HLH | glcm       | ClusterTendency                      |
| wavelet-HLH | firstorder | InterquartileRange                   |
| wavelet-HLH | firstorder | Skewness                             |
| wavelet-HLH | firstorder | Uniformity                           |
| wavelet-HLH | firstorder | Median                               |
| wavelet-HLH | firstorder | Energy                               |
| wavelet-HLH | firstorder | RobustMeanAbsoluteDeviation          |
| wavelet-HLH | firstorder | MeanAbsoluteDeviation                |
| wavelet-HLH | firstorder | TotalEnergy                          |
| wavelet-HLH | firstorder | Maximum                              |
| wavelet-HLH | firstorder | RootMeanSquared                      |
| wavelet-HLH | firstorder | 90Percentile                         |
| wavelet-HLH | firstorder | Minimum                              |

|             |            |                                  |
|-------------|------------|----------------------------------|
| wavelet-HLH | firstorder | Entropy                          |
| wavelet-HLH | firstorder | Range                            |
| wavelet-HLH | firstorder | Variance                         |
| wavelet-HLH | firstorder | 10Percentile                     |
| wavelet-HLH | firstorder | Kurtosis                         |
| wavelet-HLH | firstorder | Mean                             |
| wavelet-HLH | glrlm      | ShortRunLowGrayLevelEmphasis     |
| wavelet-HLH | glrlm      | GrayLevelVariance                |
| wavelet-HLH | glrlm      | LowGrayLevelRunEmphasis          |
| wavelet-HLH | glrlm      | GrayLevelNonUniformityNormalized |
| wavelet-HLH | glrlm      | RunVariance                      |
| wavelet-HLH | glrlm      | GrayLevelNonUniformity           |
| wavelet-HLH | glrlm      | LongRunEmphasis                  |
| wavelet-HLH | glrlm      | ShortRunHighGrayLevelEmphasis    |
| wavelet-HLH | glrlm      | RunLengthNonUniformity           |
| wavelet-HLH | glrlm      | ShortRunEmphasis                 |
| wavelet-HLH | glrlm      | LongRunHighGrayLevelEmphasis     |
| wavelet-HLH | glrlm      | RunPercentage                    |
| wavelet-HLH | glrlm      | LongRunLowGrayLevelEmphasis      |
| wavelet-HLH | glrlm      | RunEntropy                       |
| wavelet-HLH | glrlm      | HighGrayLevelRunEmphasis         |
| wavelet-HLH | glrlm      | RunLengthNonUniformityNormalized |
| wavelet-HLH | glszm      | GrayLevelVariance                |
| wavelet-HLH | glszm      | ZoneVariance                     |
| wavelet-HLH | glszm      | GrayLevelNonUniformityNormalized |
| wavelet-HLH | glszm      | SizeZoneNonUniformityNormalized  |
| wavelet-HLH | glszm      | SizeZoneNonUniformity            |
| wavelet-HLH | glszm      | GrayLevelNonUniformity           |
| wavelet-HLH | glszm      | LargeAreaEmphasis                |
| wavelet-HLH | glszm      | SmallAreaHighGrayLevelEmphasis   |
| wavelet-HLH | glszm      | ZonePercentage                   |
| wavelet-HLH | glszm      | LargeAreaLowGrayLevelEmphasis    |
| wavelet-HLH | glszm      | LargeAreaHighGrayLevelEmphasis   |
| wavelet-HLH | glszm      | HighGrayLevelZoneEmphasis        |
| wavelet-HLH | glszm      | SmallAreaEmphasis                |
| wavelet-HLH | glszm      | LowGrayLevelZoneEmphasis         |
| wavelet-HLH | glszm      | ZoneEntropy                      |
| wavelet-HLH | glszm      | SmallAreaLowGrayLevelEmphasis    |
| wavelet-HLH | ngtdm      | Coarseness                       |
| wavelet-HLH | ngtdm      | Complexity                       |
| wavelet-HLH | ngtdm      | Strength                         |
| wavelet-HLH | ngtdm      | Contrast                         |
| wavelet-HLH | ngtdm      | Busyness                         |
